# Supplementary material for: On-chip plasmonic immunoassay based on targeted assembly of gold nanoplasmonic particles
Source: Royal Society of Chemistry journal article supplement (doi:10.1039/c8an02489h), 2019-01-01
Supplement: c8an02489h1.pdf [file c8an02489h1.pdf]

## Supplementary data

### On-chip Plasmonic Immunoassay Based on Targeted Assembly of Gold Nanoplasmonic Particles

Hyo Sil Kim<sup>a,†</sup>, Sang Hun Lee<sup>b,†</sup> and Inhee Choi<sup>a\*</sup>

<sup>a</sup>Department of Life Science, University of Seoul, Seoul, 02504, South Korea

<sup>b</sup>Department of Bioengineering, University of California at Berkeley, Berkeley, California 94720,  
United States

† These authors contributed equally to this work.

\* Corresponding Authors

Correspondence Should Be Addressed To:

Inhee Choi,  
Department of Life Science,  
University of Seoul,  
Seoul, 02504,  
South Korea  
E-mail: inheechoi1@uos.ac.kr  
Phone: +82 2-6490-2675

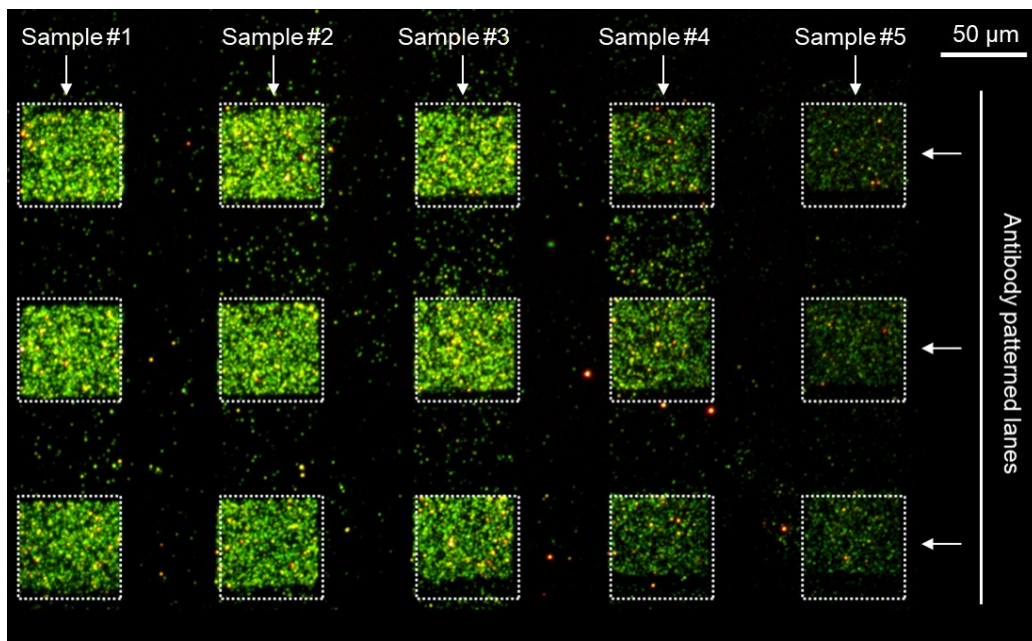

**Figure S1. Representative dark-field scattering image of intersection areas formed via multiple reactions in the multi-channels on a single glass slide.** The dimensions of each square are 50  $\mu\text{m}$  x 50  $\mu\text{m}$ .

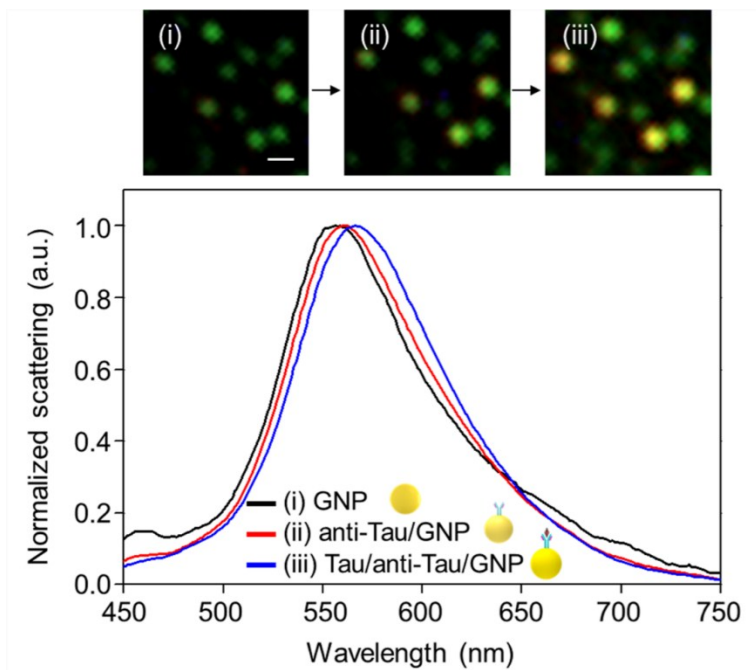

**Figure S2. Identification of the targeted assembly between antibody-conjugated GNPs and Tau.**

Changes in scattering color (top) and spectra of GNPs (bottom) due to antibody conjugation and sequential Tau binding to the GNPs. Scale bar represents 2  $\mu\text{m}$ .

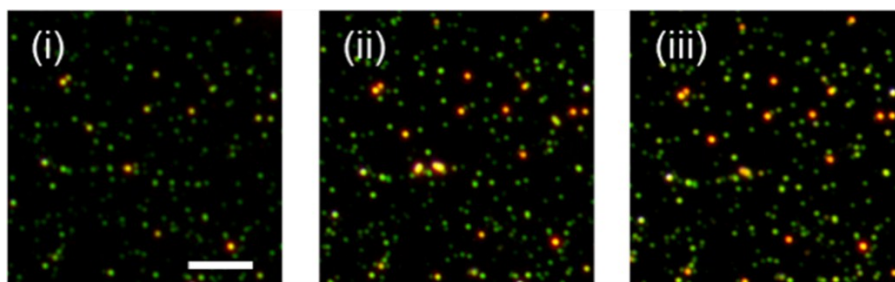

**Figure S3. Large field of view showing changes in scattering colors of GNPs.** (i) Bare GNPs (ii) Antibody-conjugated GNPs (iii) antibody-conjugated GNPs which assembled with A $\beta$ . Scale bar represents 10 $\mu$ m.

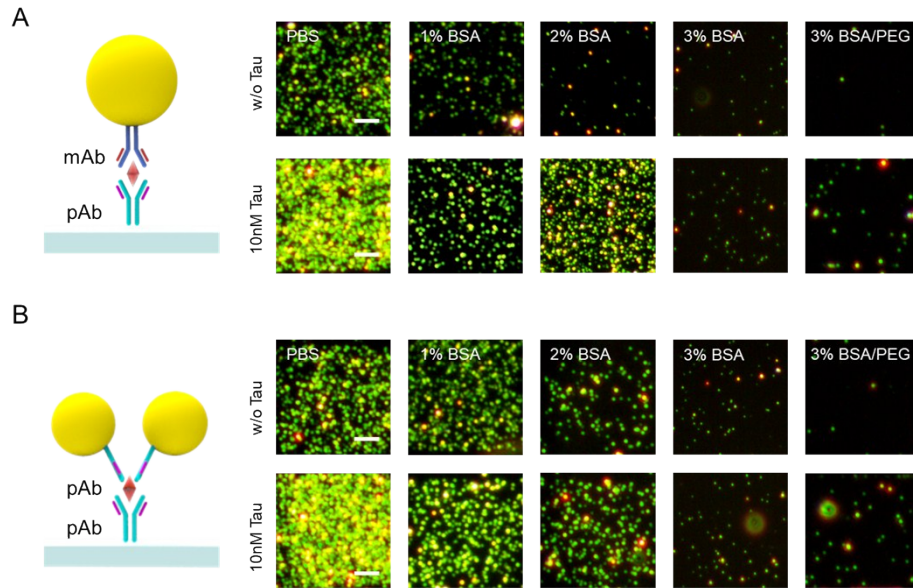

**Fig. S4. Optimization of the blocking condition for Tau.** (A) Case 1: capture Ab (pAb) and detection Ab (mAb). (B) Case 2: capture Ab (pAb) and detection Ab (pAb). For both cases, 1%, 2%, 3% BSA and 3% BSA/1% PEG were tested as blocking agents. Scale bars represent 20  $\mu\text{m}$ .

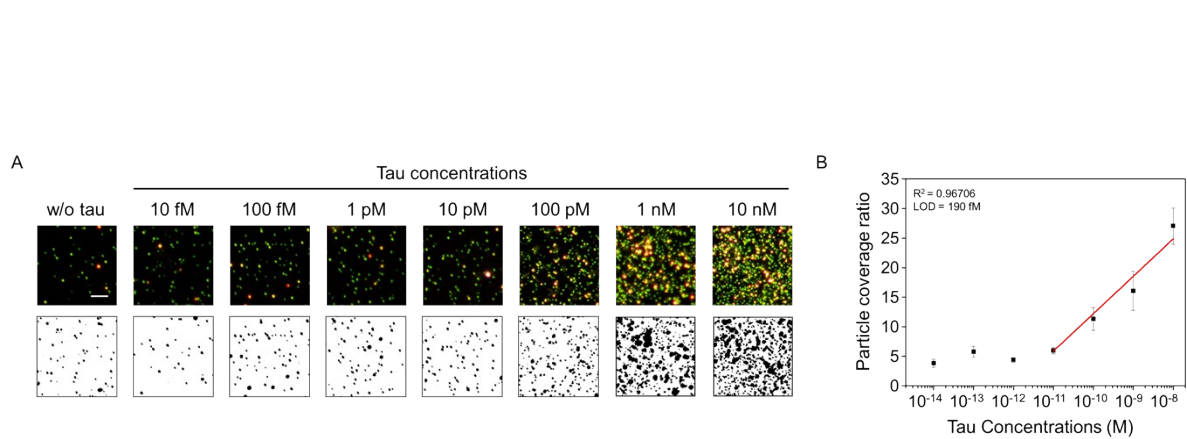

**Figure S5. Quantitative detection of Tau based on the targeted assemblies of GNPs.** (A) Concentration dependent dark-field scattering images (top) and their mask images (bottom) obtained with varying the concentration of Tau. Scale bar represents 20  $\mu\text{m}$ . Masks of dark-field scattering images were obtained ImageJ software program. (B) Calibration curves for Tau obtained from the particle coverage ratios.

**Table S1. Comparison of working ranges and LOD values in various methods for detecting A $\beta$  and Tau.**

| <b>Methods</b>                                                        | <b>Target</b> | <b>Working range</b> | <b>Limit of detection (LOD)</b> |
|-----------------------------------------------------------------------|---------------|----------------------|---------------------------------|
| <b>Our immunoassay system</b>                                         | A $\beta$     | 10 fM - 10 nM        | 170 fM                          |
| <b>Commercial ELISA kit</b>                                           | A $\beta$     | 1 - 100 pM           | 1.39 pM                         |
| <b>Colorimetric detection with gold nanoparticles<sup>42</sup></b>    | A $\beta$     | 10.5 - 313.5 nM      | 600 pM                          |
| <b>Electrochemical immunosensor<sup>43</sup></b>                      | A $\beta$     | 10 pM - 100 nM       | 10 pM                           |
| <b>Dot-blot immunoassay with gold nanoparticles<sup>44</sup></b>      | A $\beta$     | 20 pM - 2 $\mu$ M    | 10 pM                           |
| <b>Electrochemical detection with gold nanoparticles<sup>45</sup></b> | A $\beta$     | 500 nM - 20 $\mu$ M  | 1 $\mu$ M                       |
| <b>Surface plasmon resonance detection<sup>46</sup></b>               | A $\beta$     | 20 pM - 5 nM         | 3.3 pM                          |
| <b>Our immunoassay system</b>                                         | Tau           | 10 fM - 10 nM        | 190 fM                          |
| <b>Commercial ELISA kit</b>                                           | Tau           | 397 fM – 26 pM       | 128 fM                          |
| <b>Quartz crystal balance (QCM) immunosensor<sup>47</sup></b>         | Tau           | 0 – 500 nM           | 42 nM                           |
| <b>Fluorescence quenching<sup>48</sup></b>                            | Tau           | 0 – 769 pM           | 82 pM                           |

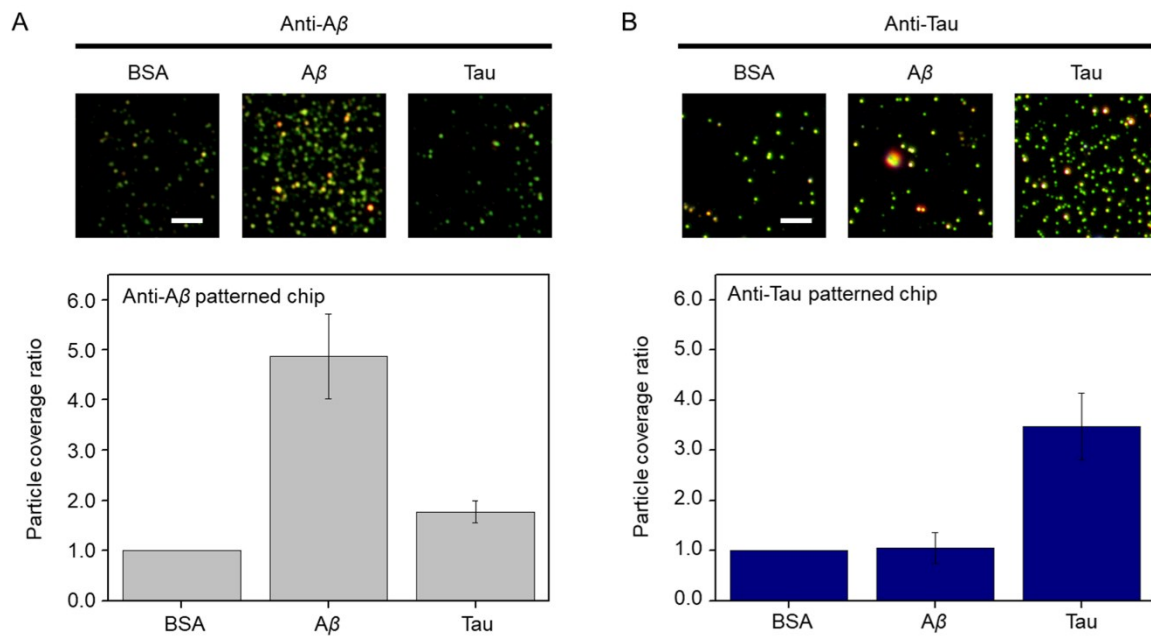

**Figure S6. Cross reaction tests of the on-chip plasmonic immunoassay.** (A) Signals of different targets for the A $\beta$  antibody-patterned chip. (B) Signals of different targets for the Tau antibody-patterned chip. (Top) dark-field scattering images and (bottom) particle coverage ratios for different targets. Scale bars represent 20  $\mu\text{m}$ .
